# Supplementary material for: A 195Pt NMR study on zero-magnetic-field splitting and the phosphorescence properties in the excited triplet states of cyclometalated platinum(ii) complexes
Source: Royal Society of Chemistry journal article supplement (doi:10.1039/d0dt00532k), 2020-01-01
Supplement: d0dt00532k1.pdf [file d0dt00532k1.pdf]

## Supplementary information for

### **A $^{195}\text{Pt}$ NMR Study on Zero-Magnetic-Field Splitting and the Phosphorescence Properties in the Excited Triplet States of Cyclometalated Platinum(II) Complexes**

**Soichiro Akagi,<sup>a</sup> Sho Fujii,<sup>\*a,b</sup> and Noboru Kitamura<sup>\*a,b,c</sup>**

*<sup>a</sup>Department of Chemical Sciences and Engineering, Graduate School of Chemical Sciences and Engineering, Hokkaido University, Sapporo 060-0810, Japan*

*<sup>b</sup>Department of Chemistry, Faculty of Science, Hokkaido University, Sapporo 060-0810, Japan*

*<sup>c</sup> Toyota Physical and Chemical Research Institute, Nagakute 480-1192, Japan*

\*E-mail: sfujii@sci.hokudai.ac.jp, kitamura@sci.hokudai.ac.jp

## Preparations and Characterizations of 1Pt – 3Pt.

**Chemicals and Characterizations.** Potassium tetrachloroplatinate and benzo[h]quinoline (bhq) were purchased from Wako Pure Chemical Co., Ltd. 2-Phenylpyridine (ppy), acetylacetonone (acac), and dipivaloylmethane (dpm) were obtained from Tokyo Chemical Industry Co., Ltd. All of these chemicals were used as received without further purification. 2-(2-Thienyl)pyridine (thpy) was prepared according to the literature.<sup>1</sup> Electron spray ionization mass spectroscopy (ESI-MS) and FT <sup>1</sup>H/<sup>195</sup>Pt NMR measurements were conducted by using a micromassZQ spectrometer (Waters Co.) and a 400 MHz JNM-ECZ spectrometer (JEOL Ltd.), respectively. For <sup>1</sup>H and <sup>195</sup>Pt NMR spectroscopies, tetramethylsilane (in CDCl<sub>3</sub>, 0 ppm) and potassium tetrachloroplatinate (in D<sub>2</sub>O, –1618 ppm with respect to hexachloroplatinate) were used as internal and external standards, respectively, for determining the chemical shifts of the NMR signals in ppm.

**Synthesis of Platinum(II) Complexes [Pt(C<sup>^</sup>N)(O<sup>^</sup>O)] (1Pt–3Pt).** [Pt(C<sup>^</sup>N)(O<sup>^</sup>O)] complexes (**1Pt**–**3Pt**) were prepared by a microwave-assisted method as described below.<sup>2</sup> A C<sup>^</sup>N cyclometalate ligand (bhq, thpy, or ppy, 0.241 mmol) was dissolved in 10 mL of a 2-ethoxyethanol/water solution (3/1 = v/v) of K<sub>2</sub>PtCl<sub>4</sub> (100 mg, 0.241 mmol). The solution deaerated by purging an Ar gas stream was heated at 60°C for 1 min under microwave irradiation (150–200 W) and, then, the mixture was cooled immediately to room temperature by an ice bath. After the heating-cooling procedures mentioned above being performed three times, 20 mL of water was added dropwise to the solution. The yellow ~ green precipitates were collected by filtration and dried in vacuo. The chloro-bridged dimer as the product was used for the following reaction without further purification. The powder of the chloro-bridged dimer (1 eq.) was suspended in 10 mL of a 2-ethoxyethanol/water mixture (3/1 = v/v) in the presence of both CH<sub>3</sub>COONa (10 eq.) and 2 eq. of dipivaloylmethane (**1Pt**) or acetylacetonone (**2Pt** and **3Pt**). The mixture deaerated by purging an Ar gas stream was heated at 60°C for 10 min under microwave irradiation (150–200 W). An addition of an excess amount of water to the reaction mixture yielded yellow ~ green precipitates. The precipitates washed thoroughly with water were dried and

purified by silica-gel column chromatography with dichloromethane as an eluent. The eluent was concentrated by evaporation and, then, methanol was diffused slowly to the solution, yielding the yellow ~ green crystals.

**[Pt(bhq)(dpm)] (1Pt)**: Yield = 43 mg (32%). <sup>1</sup>H NMR (CDCl<sub>3</sub>, ppm)  $\delta$  = 9.12 (d, 1H), 8.27 (d, 1H), 7.82–7.75 (m, 2H), 7.58 (d, 2H), 7.52 (d, 1H), 7.45 (dd, 1H), 5.87 (s, 1H), 1.32 (d, 18H). <sup>195</sup>Pt NMR (CDCl<sub>3</sub>, ppm)  $\delta$  = –2770. ESI-MS (CH<sub>3</sub>CN) for PtC<sub>24</sub>H<sub>27</sub>NO<sub>2</sub>: *m/z* 556 ([M+H]<sup>+</sup>).

**[Pt(thpy)(acac)] (2Pt)**: Yield = 26 mg (24%). <sup>1</sup>H NMR (CDCl<sub>3</sub>, ppm)  $\delta$  = 8.80 (d, 1H), 7.67 (td, 1H), 7.49 (d, 1H), 7.29 (t, 1H), 7.20 (d, 1H), 6.92 (td, 1H), 5.48 (s, 1H), 2.00 (d, 6H). <sup>195</sup>Pt NMR (CDCl<sub>3</sub>, ppm)  $\delta$  = –2790. ESI-MS (CH<sub>3</sub>CN) for PtC<sub>14</sub>H<sub>13</sub>NO<sub>2</sub>S: *m/z* 454 ([M+H]<sup>+</sup>).

**[Pt(ppy)(acac)] (3Pt)**: Yield = 31 mg (29%). <sup>1</sup>H NMR (CDCl<sub>3</sub>, ppm)  $\delta$  = 9.00 (d, 1H), 7.80 (td, 1H), 7.62 (d, 2H), 7.44 (dd, 1H), 7.21 (td, 1H), 7.13–7.08 (m, 2H), 5.48 (s, 1H), 2.01 (d, 6H). <sup>195</sup>Pt NMR (CDCl<sub>3</sub>, ppm)  $\delta$  = –2870. ESI-MS (CH<sub>3</sub>CN) for PtC<sub>16</sub>H<sub>15</sub>NO<sub>2</sub>: *m/z* 448 ([M+H]<sup>+</sup>).

## References

1. J. Pospech, A. Tlili, A. Spannenberg, H. Neumann, M. Beller, *Chem. Eur. J.*, **2014**, *20*, 3135–3141.
2. N. Godbert, T. Pugliese, I. Aiello, A. Bellusci, A. Crispini, M. Ghedini, *Eur. J. Inorg. Chem.*, **2007**, 5105–5111.
